# Supplementary material for: Sorption and photodegradation under visible light irradiation of an organic pollutant by a heterogeneous UiO-67–Ru–Ti MOF obtained by post-synthetic exchange
Source: Royal Society of Chemistry journal article supplement (doi:10.1039/c6ra26552a), 2016-12-23
Supplement: c6ra26552a1.pdf [file c6ra26552a1.pdf]

**Supplementary Information for:**

**Sorption and photodegradation under visible light irradiation of an  
organic pollutant by a heterogeneous UiO-67-Ru-Ti MOF obtained  
by Post-Synthetic Exchange.**

**Ricardo NAVARRO AMADOR, Michaël CARBONI\*, Daniel MEYER**

*Institut de Chimie Séparative de Marcoule, Laboratoire des systèmes hybrides pour la séparation, UMR 5257, ICSM-LHYS, Bâtiment 426, BP*

*17171, 30207 Bagnols-sur-Cèze cedex, France*

**Table of content**

|                                                                                   |             |
|-----------------------------------------------------------------------------------|-------------|
| <b>1. Digestion of MOFs</b>                                                       | <b>S2</b>   |
| <b>2. Synthesis of ligands</b>                                                    | <b>S2-3</b> |
| <b>3. XRF Analysis</b>                                                            | <b>S3</b>   |
| <b>4. Calibration curve for methylene blue</b>                                    | <b>S4</b>   |
| <b>5. Titanium exchange rate</b>                                                  | <b>S4</b>   |
| <b>6. BET analysis</b>                                                            |             |
| <b>7. SEM Pictures</b>                                                            | <b>S6</b>   |
| <b>8. Photophysical properties</b>                                                | <b>S6</b>   |
| <b>9. Kinetics of the dye sorption</b>                                            | <b>S7-8</b> |
| <b>10. Dye degradation under UV light</b>                                         | <b>S9</b>   |
| <b>11. Possible degradation products of Methylene Blue</b>                        | <b>S9</b>   |
| <b>12. Comparison between theoretical and experimental values obtained by TGA</b> | <b>S10</b>  |
| <b>13. EDS Analysis (Table)</b>                                                   | <b>S10</b>  |
| <b>14. Kinetic Parameters (Table)</b>                                             | <b>S10</b>  |
| <b>15. References</b>                                                             | <b>S10</b>  |

## 1. Digestion of MOFs

For ICP analysis 5 mg of the dried material were digested in a mixture of 0.35 mL of H<sub>2</sub>SO<sub>4</sub> and 0.115 mL of H<sub>2</sub>O<sub>2</sub>. This solution was heated at 120°C during 4 hours until the solution was clear. 60 µL were dissolved in 10 mL of an 2% HNO<sub>3</sub>/H<sub>2</sub>O solution.

## 2. Synthesis of ligands

### 2.1 Synthesis of (2,2'-Bipyridine)-5,5'-dicarboxylic acid (bpydc)<sup>[2]</sup>

5,5'-dimethyl-2,2'-bipyridine (1 g; 5.43 mmol) and KMnO<sub>4</sub> (5.60 g; 35.4 mmol) were added into a round bottom flask with 100 mL of distilled water. The solution was heated and stirred at 115°C during 3 hours. After cooling to room temperature, the solution was filtered and further cooled at 0°C. Then, HCl (37%) was slowly added until the apparition of a white precipitate. The solid was filtered and dried in an oven at 40°C overnight (<sup>1</sup>H NMR (D<sub>2</sub>O+NaOD): δ 8.84(dd,2H) 8.18 (dd, 2H) and 7.92 (dd, 2H)) (yield 50%).

### 2.2 Synthesis of Ru(bpy)<sub>2</sub>Cl<sub>2</sub>

NaCl (0.499 g, 8.5 mmol), sucrose (0.5135 g, 1.5 mmol) and cis-2,2'-Bypiridine (bipdc)(1.311 g, 8.36 mmol) were added to 10 mL of degased H<sub>2</sub>O and 3 mL of concentrated HCl (37%). The mixture is heated and kept under reflux and vigorous agitation for 15 min. In different intervals of 15 minutes, RuCl<sub>3</sub> anhydrous (0.741 g, 3.57 mmol) and ascorbic acid (0.886 g, 5 mmol) were added to the solution and kept under stirring and heating during another 15 minutes. The solution was cooled at room temperature and a precipitate was separated by filtration. The filtrated solid was placed in a Soxhlet extractor with dichloromethane during 24 hours. The extracted liquid was distilled and the solid obtained was washed with a saturated solution of NaHCO<sub>3</sub>. The final solid was separated and dried in an oven at 50°C overnight. (<sup>1</sup>H NMR 400 Mhz, DMSO, 293.15 K): 10.06 (dd, 2H); 8.72 (dd, 2H); 8.56 (dd, 2H); 8.15 (m, 2H); 7.86(m, 2H); 7.77 (m,2H); 7.19 (m, 2H);) (Yield 55%).

### 2.3 Synthesis of $[Ru(bpy)_2(5,5'-dcbpy)]$

The Ru complex was obtained by following a previously reported procedure<sup>[3,4]</sup>.  $Ru(bpy)_2Cl_2$  (160 mg, 0.33 mmol) and bpydc (101 mg, 0.41 mmol) were dissolved in 10 mL of  $H_2O$  and 10 mL of ethanol. The solution was kept and stirred under an Ar atmosphere. The solution was then refluxed for 12 hours. The solvent was evaporated and the resulting solid was recrystallized in a solution of 3 mL of MeOH and 20 mL of diethyl ether. The precipitate was filtered and left to dry in an oven at 40°C overnight. ( $^1H$  NMR ( $D_2O$ ):  $\delta$  9.00 (d, 2H), 8.88 (m, 4H), 8.53 (d, 2H); 8.24 (m, 4H); 8.01 (s, 2H); 7.86 (d, 2H); 7.80 (d, 2H); 7.60(t, 2H); 7.53(t, 2H)) (Yield 75%).

### 3. XRF Analysis

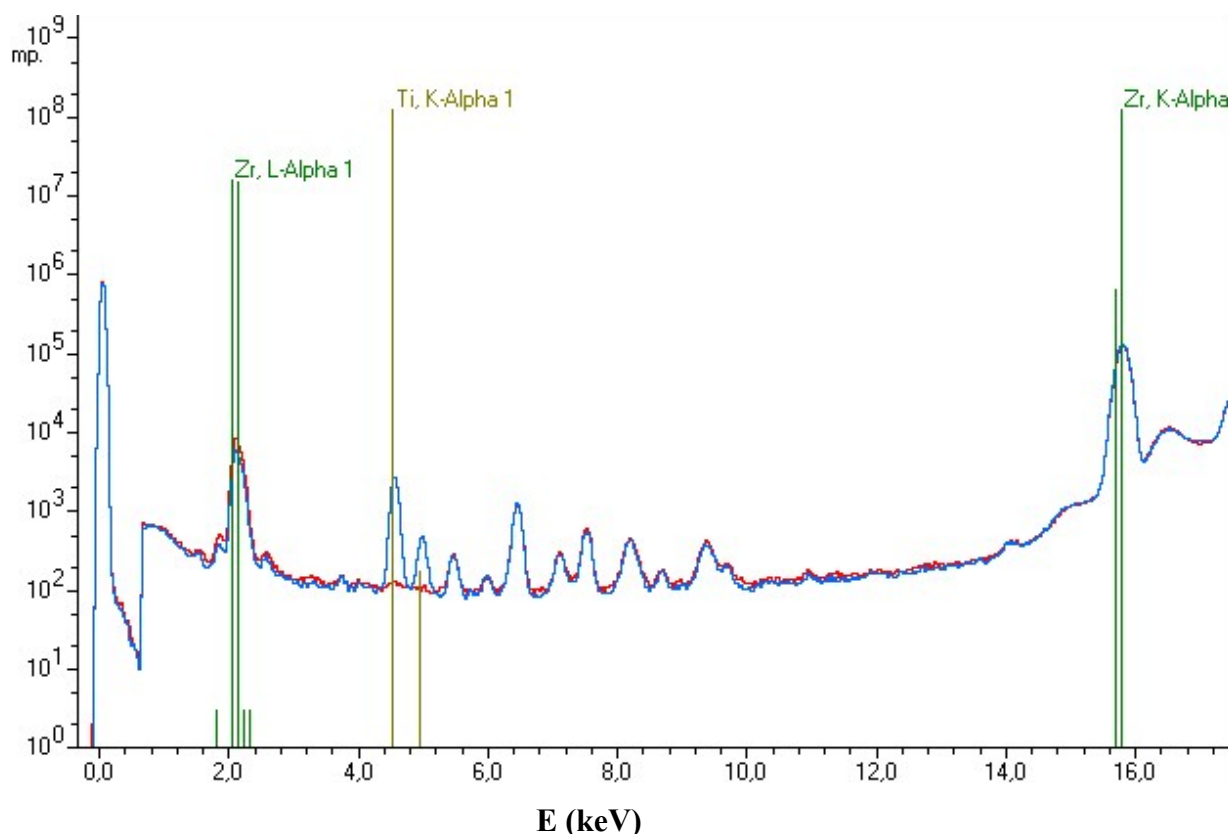

**Figure S1.** XRF Spectra of UiO-67-Ru and UiO-67-Ru-Ti MOFs

#### 4. Calibration curve for methylene Blue

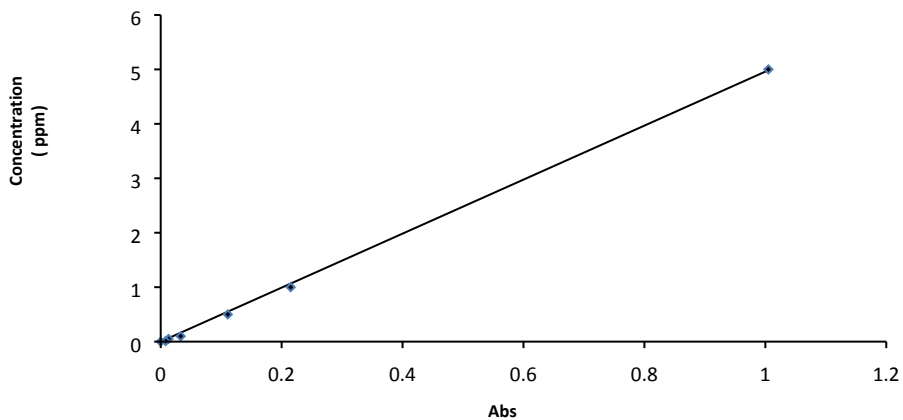

Figure S2. Calibration curve for Methylene Blue

#### 5. Titanium exchange rate

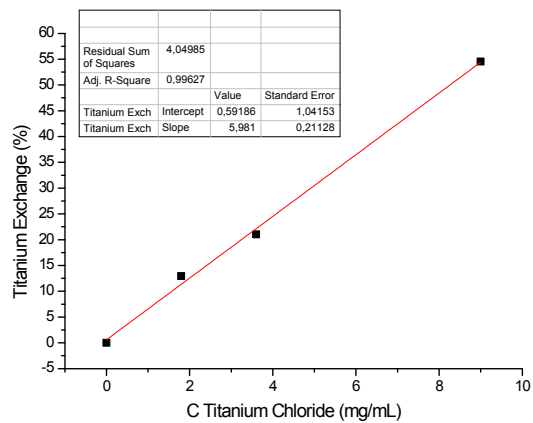

Figure S3. Fitted data for the exchange of Ti in UiO-67 MOFs

## 6. BET Analysis

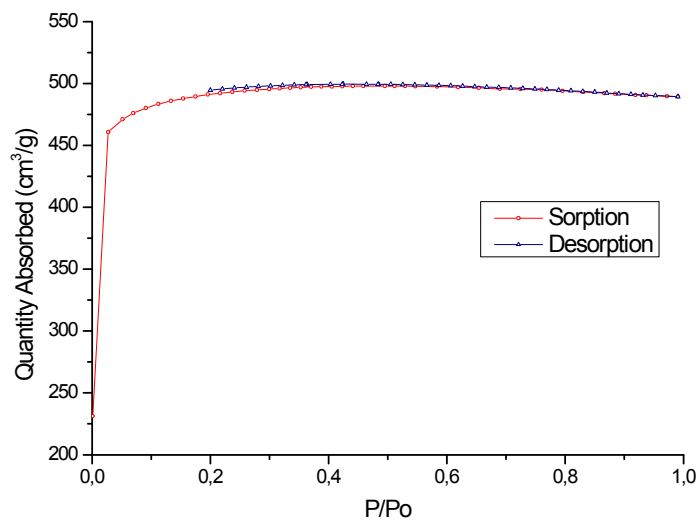

**Figure S4.** Linear sorption isotherm of UiO-67-Ru

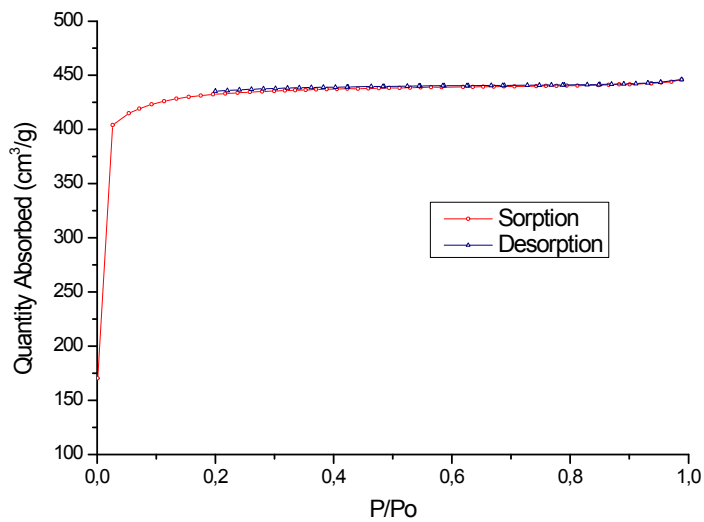

**Figure S5.** Linear sorption isotherm of UiO-67-Ru-Ti50

## 7. SEM Pictures

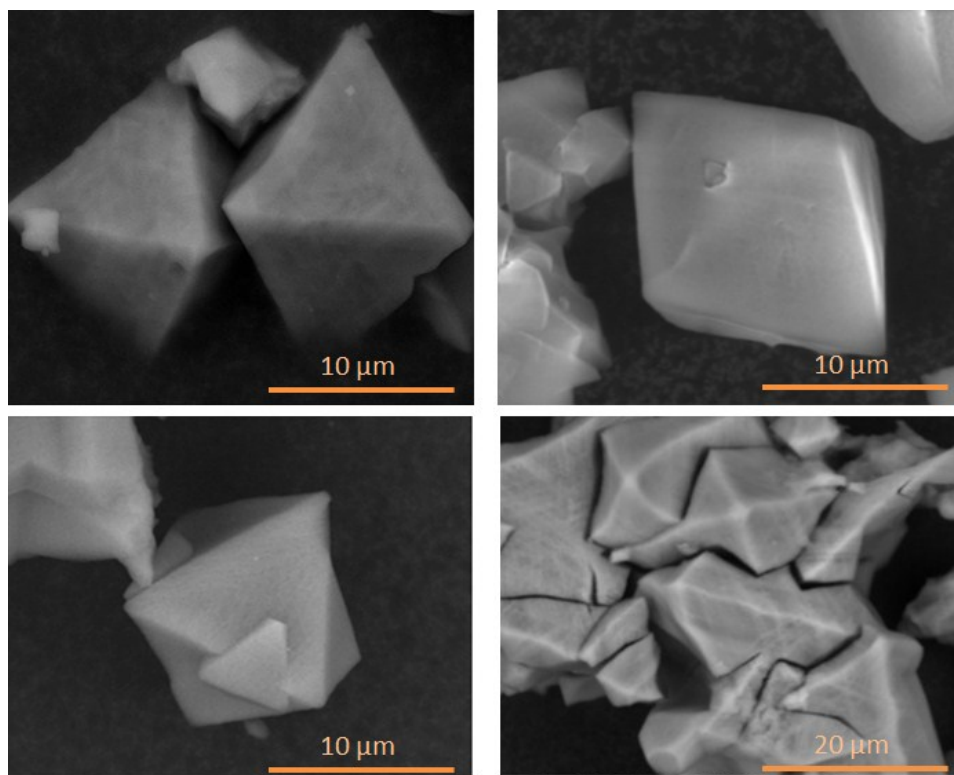

**Figure S6.** SEM Pictures of different obtained MOFS a)Uio-67, b)Uio-67-Ti50, c)Uio-67-Ru  
d)Uio-67-Ru-Ti50

## 8. Photophysical properties

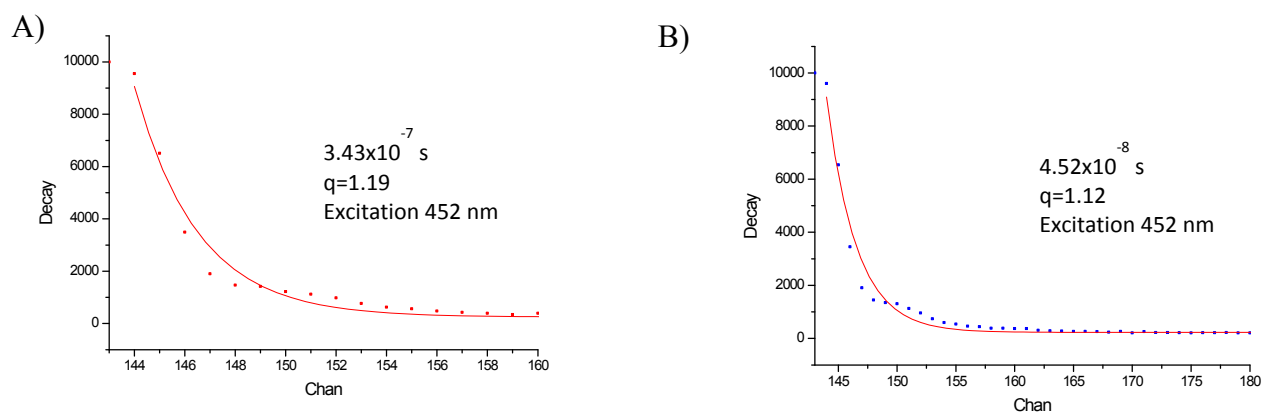

**Figure S7.** Lifetime of Uio67-Ru (A) and Uio67-Ru-Ti50 (B)

## 9. Kinetics of the dye sorption

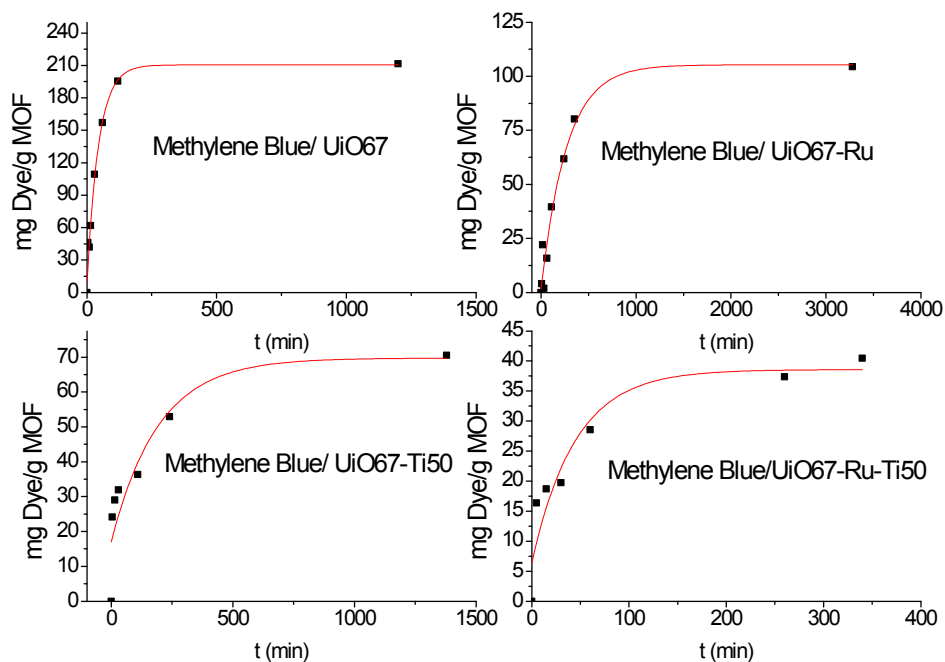

**Figure S8.** Adsorption isotherms for MB over UiO67, UiO67-Ru, UiO67-Ti and UiO67-Ru-Ti MOFs.

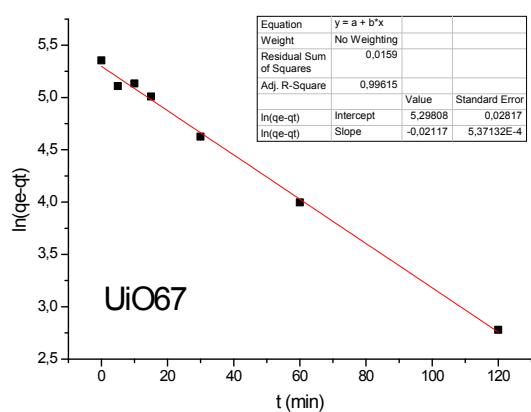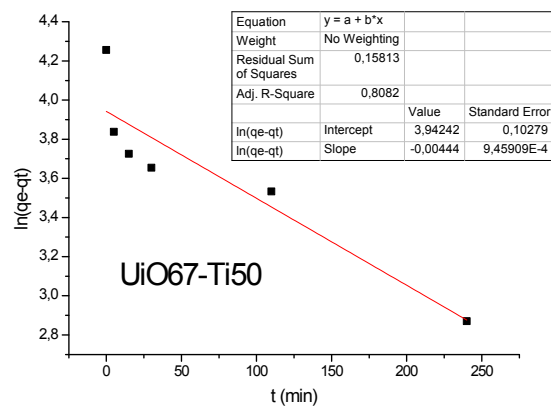

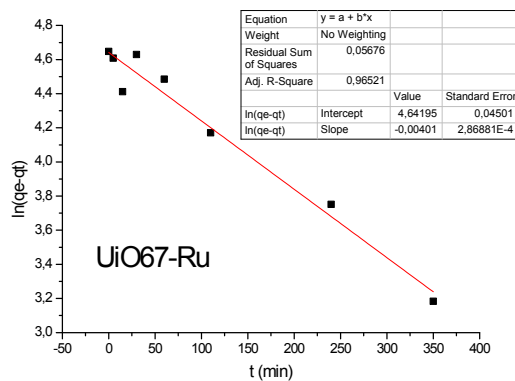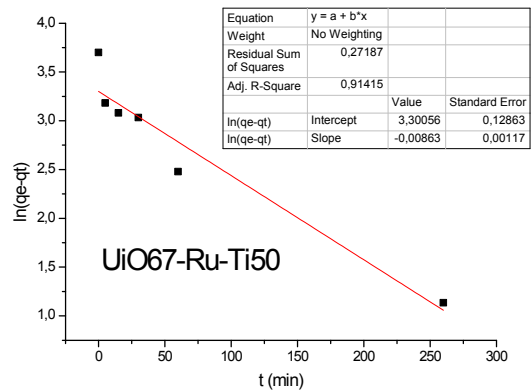

Figure S9. First order fitting adsorption isotherms for Methylene Blue over different MOFs.

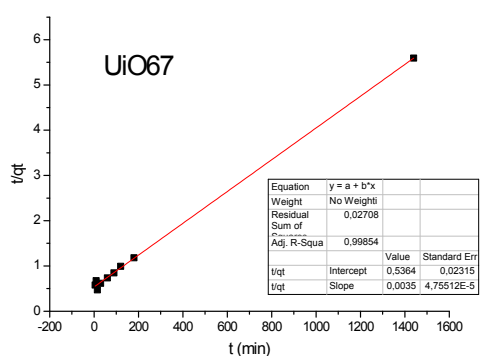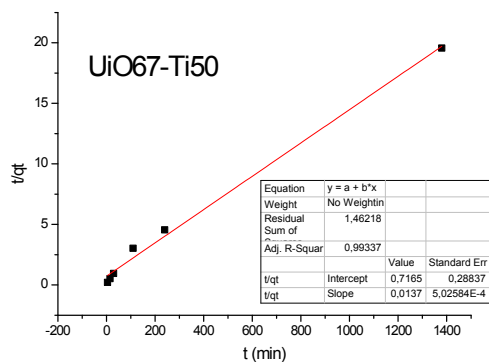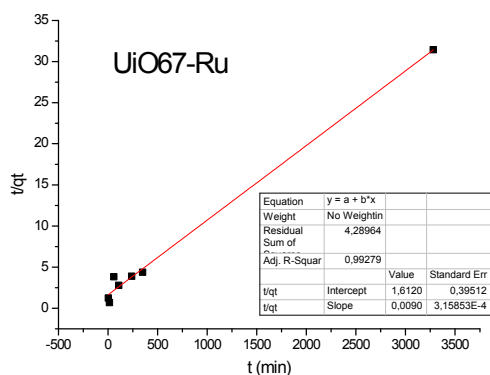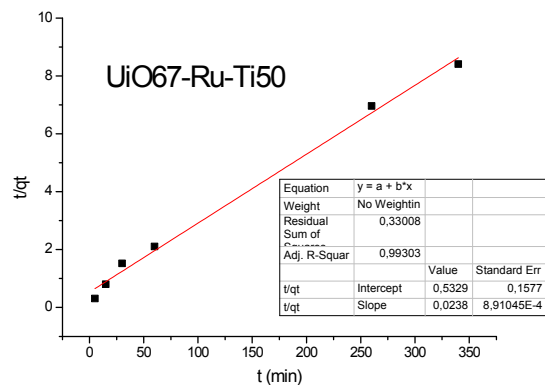

Figure S10. Second order fitting adsorption isotherms for Methylene Blue over different MOFs.



## 10. Dyes degradation experiments under UV light

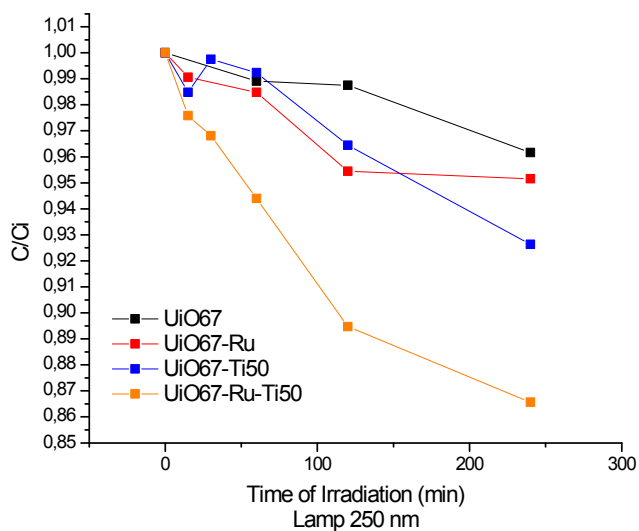

Figure S11. Photo-degradation of MB under UV irradiation (250 nm)

## 11. Possible degradation products of Methylene Blue

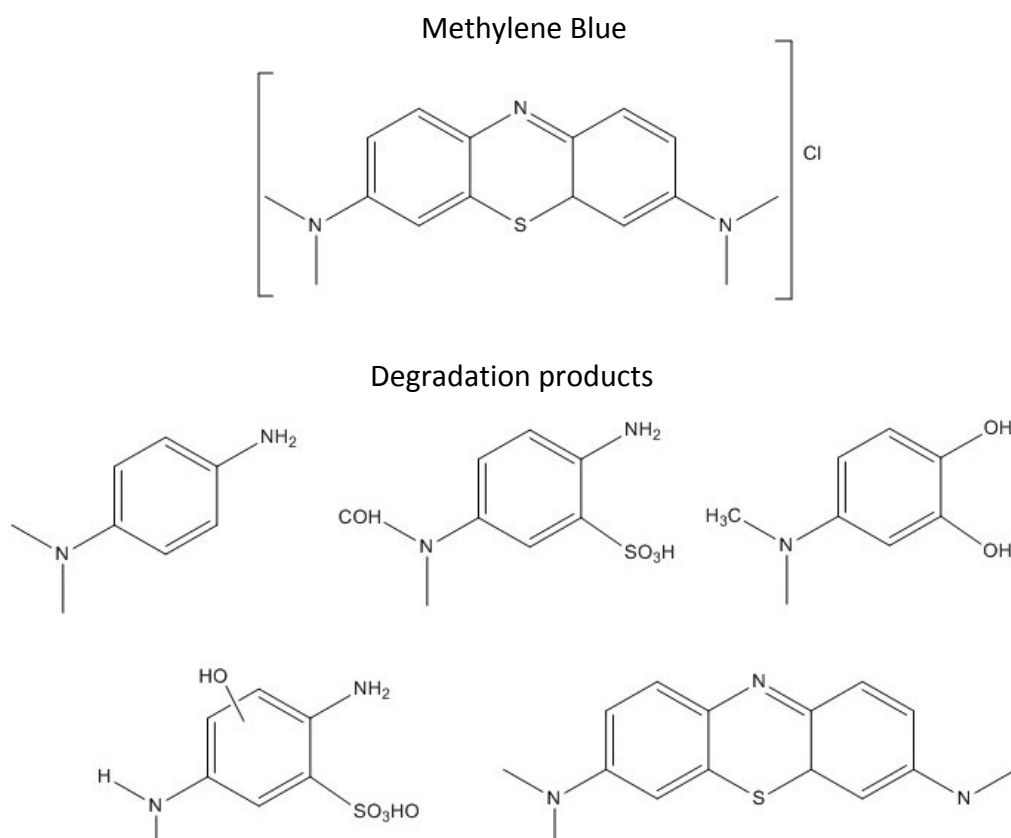

Figure S12. Degradation products of Methylene Blue as studied by Jing et al. [5]

## 12. Comparison between theoretical and experimental values obtained by TGA

**Table S1.** Values of theoretical and experimental organic fractions in Ti exchanged and un-exchanged UiO67 MOFs

| MOF           | Weight % of Inorganic Oxides | Experimental Weight % of Organic Part | Theoretical Weight % of Organic Part |
|---------------|------------------------------|---------------------------------------|--------------------------------------|
| UiO67-Ru      | 39.18                        | 60.82                                 | 66.53                                |
| UiO67-Ru-Ti50 | 47.025                       | 52.98                                 | 70.52                                |

## 13. EDS Analysis (Table)

**Table S2.** EDS quantification results of UiO-67-Ru-Ti50

| Quantification results |          |        |          |          |          |
|------------------------|----------|--------|----------|----------|----------|
| Norm. mass percent (%) |          |        |          |          |          |
| Spectrum               | C        | O      | Ti       | Zr       | Ru       |
| UiO67-Ti-Ru 5          | 24,22812 | 21,371 | 7,314645 | 46,09156 | 0,994675 |

## 14. Kinetic Parameters (Table)

**Table S3.** Pseudo-first order sorption kinetic parameters for methylene blue on different MOFs

| Parameter           | UiO-67                                              | UiO-67-Ru                                           | UiO-67-Ti50                                         | UiO-67-Ru-Ti50                          |
|---------------------|-----------------------------------------------------|-----------------------------------------------------|-----------------------------------------------------|-----------------------------------------|
| $q_e$ (exp) (mg/g)  | 211.49                                              | 104.39                                              | 70.54                                               | 40.46                                   |
| $k_1$ [mg/(g min)]  | $-2.18 \times 10^{-2}$<br>$\pm 2.11 \times 10^{-4}$ | $-4.44 \times 10^{-3}$<br>$\pm 2.87 \times 10^{-4}$ | $-4.01 \times 10^{-3}$<br>$\pm 9.46 \times 10^{-4}$ | $-8.63 \times 10^{-3}$<br>$\pm 0.00117$ |
| $q_e$ (calc) (mg/g) | 199.94 $\pm$ 1.03                                   | 103.65 $\pm$ 1.05                                   | 51.54 $\pm$ 1.11                                    | 27.13 $\pm$ 1.14                        |
| $R^2$               | 0.99                                                | 0.96                                                | 0.81                                                | 0.91                                    |

## 15. References

- [1] S. Brunauer, P. H. Emmett, E. Teller, *J. Am. Chem. Soc.* **1938**, *60*, 309–319.
- [2] I. Gamba, I. Salvadó, G. Rama, M. Bertazzon, M. I. Sánchez, V. M. Sánchez-Pedregal, J. Martínez-Costas, R. F. Brissos, P. Gamez, J. L. Mascareñas, et al., *Chem. - Eur. J.* **2013**, *19*, 13369–13375.

- [3] P.-H. Xie, Y.-J. Hou, B.-W. Zhang, Y. Cao, F. Wu, W.-J. Tian, J.-C. Shen, *J. Chem. Soc. Dalton Trans.* **1999**, 4217–4221.
- [4] W. A. Maza, S. R. Ahrenholtz, C. C. Epley, C. S. Day, A. J. Morris, *J. Phys. Chem. C* **2014**, *118*, 14200–14210.
- [5] H.-P. Jing, C.-C. Wang, Y.-W. Zhang, P. Wang, R. Li, *RSC Adv* **2014**, *4*, 54454–54462.
